# Supplementary material for: Statistical analysis of twenty years (1993 to 2012) of data from mainland China’s first intervention center for children with autism spectrum disorder
Source: PubMed Central journal article supplement (PMC4332440; doi:10.1186/2040-2392-5-52), 2014-11-12

A

age\_at\_first\_diagnosis  
~ first\_diagnosis\_year + first\_diagnosis\_is\_autistic\_tendencies

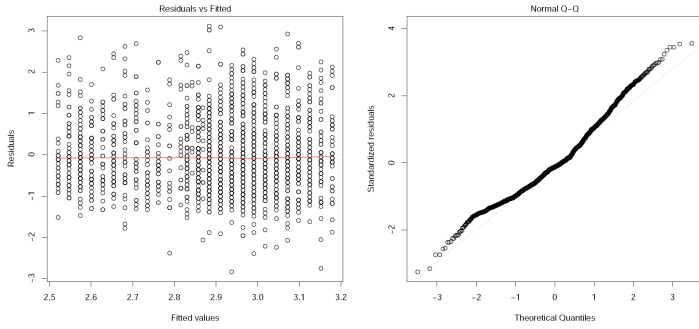

B

age\_at\_first\_diagnosis ~ first\_diagnosis\_year  
+ maternal(paternal)\_age\_at\_childbirth + maternal(paternal)\_education\_level

(maternal)

(paternal)

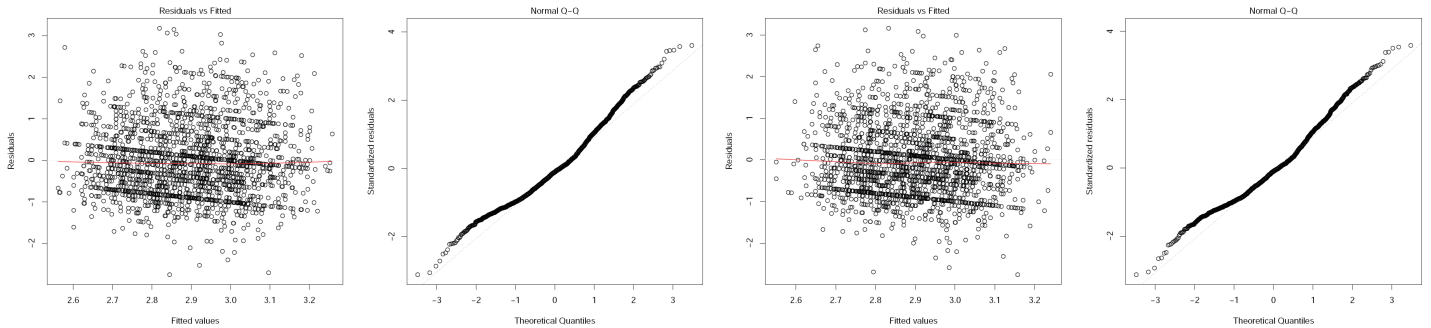

C

maternal(paternal)\_age\_at\_childbirth  
~ child\_birth\_year + maternal(paternal)\_education\_level

(maternal)

(paternal)

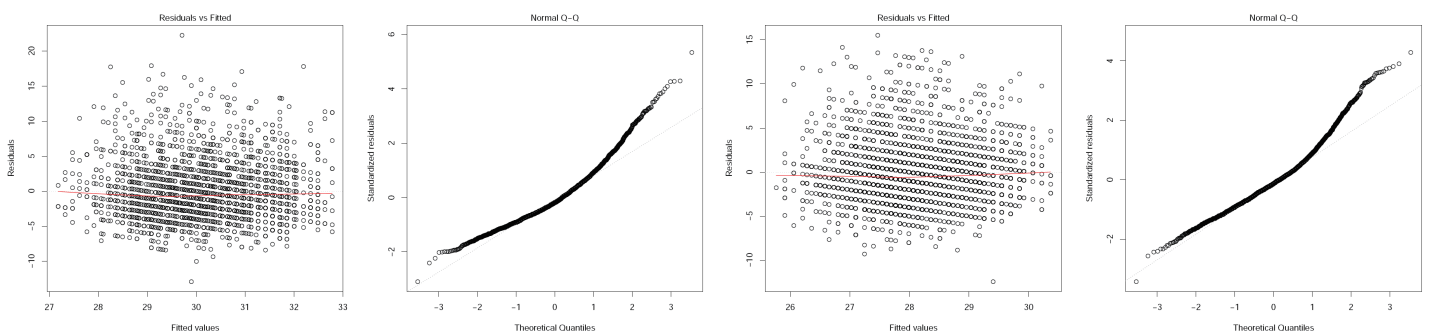

Supplement: 13229_2014_154_MOESM2_ESM.pdf [file 13229_2014_154_MOESM2_ESM.pdf]
