# Supplementary material for: Statistical analysis of twenty years (1993 to 2012) of data from mainland China’s first intervention center for children with autism spectrum disorder
Source: PubMed Central journal article supplement (PMC4332440; doi:10.1186/2040-2392-5-52), 2014-11-12

A

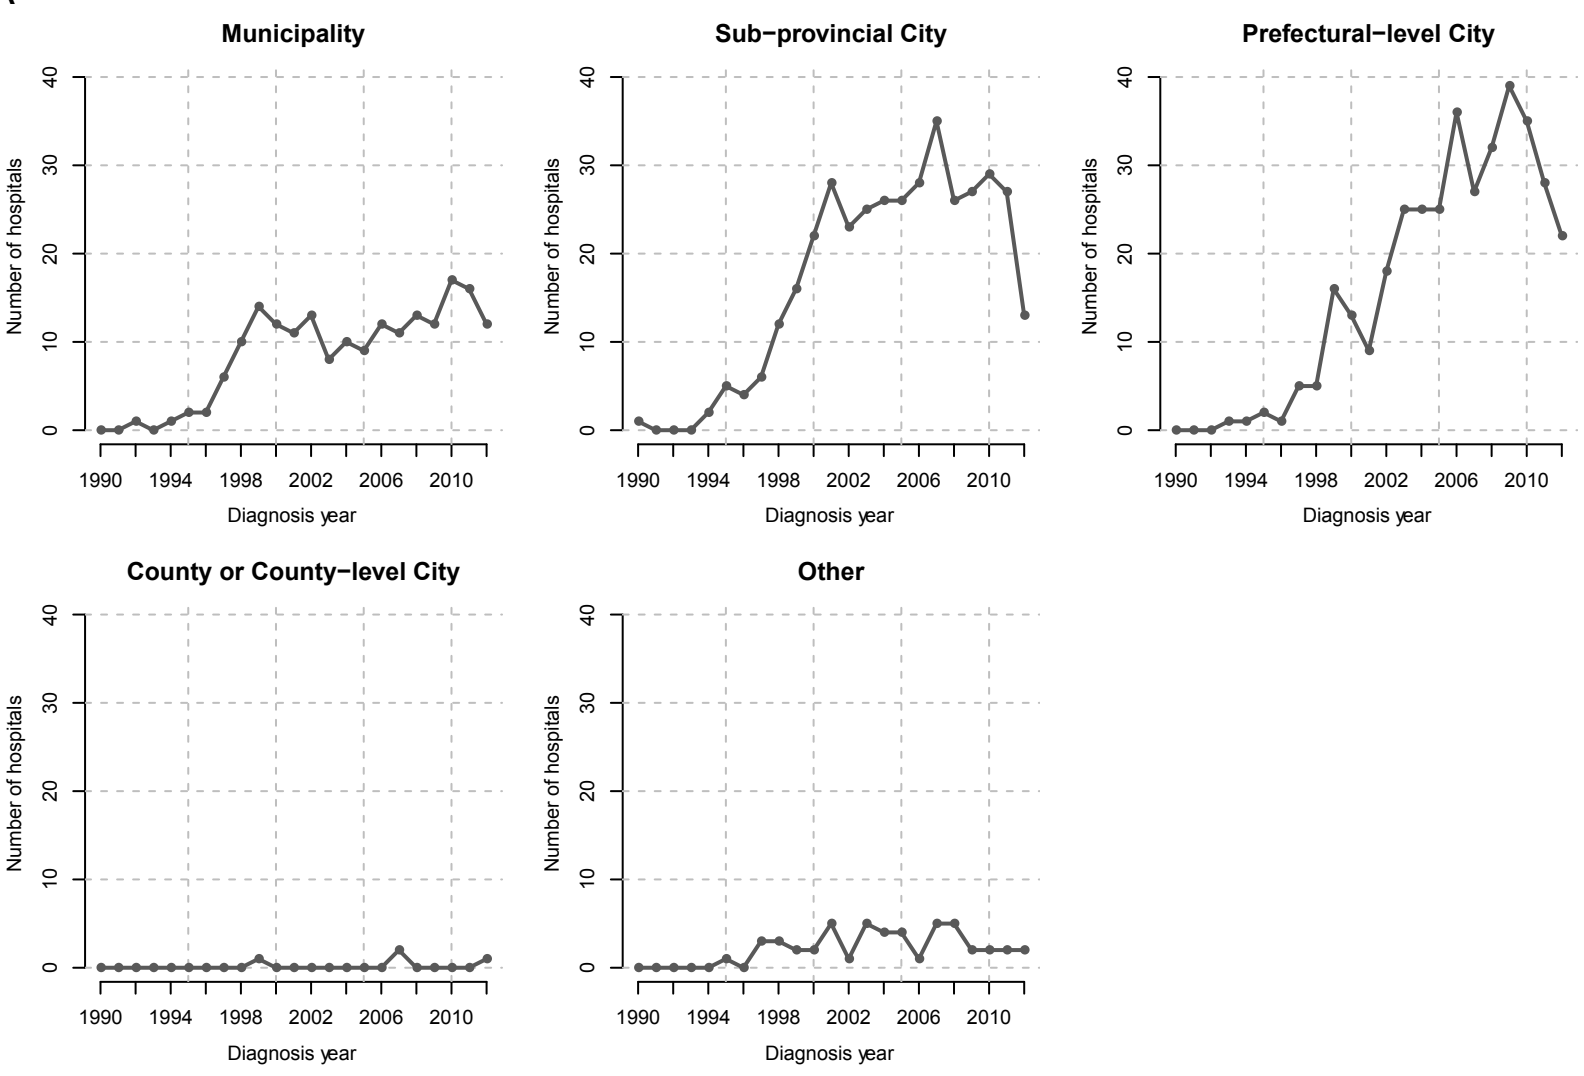

B

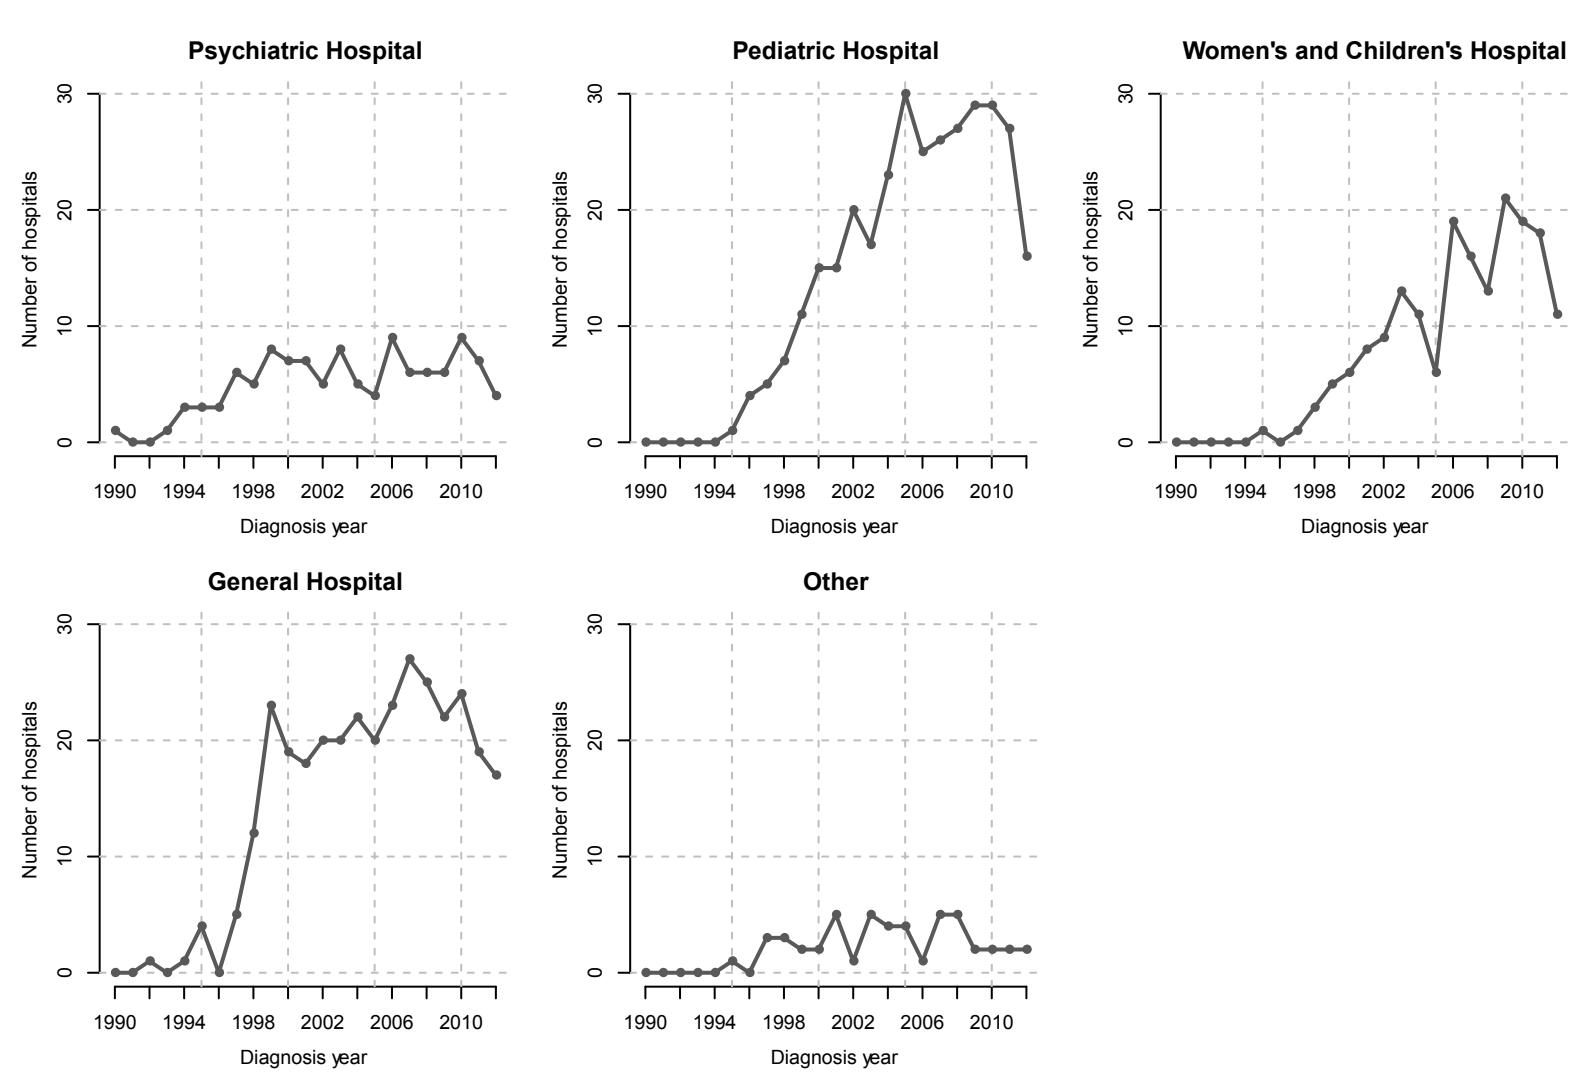

C

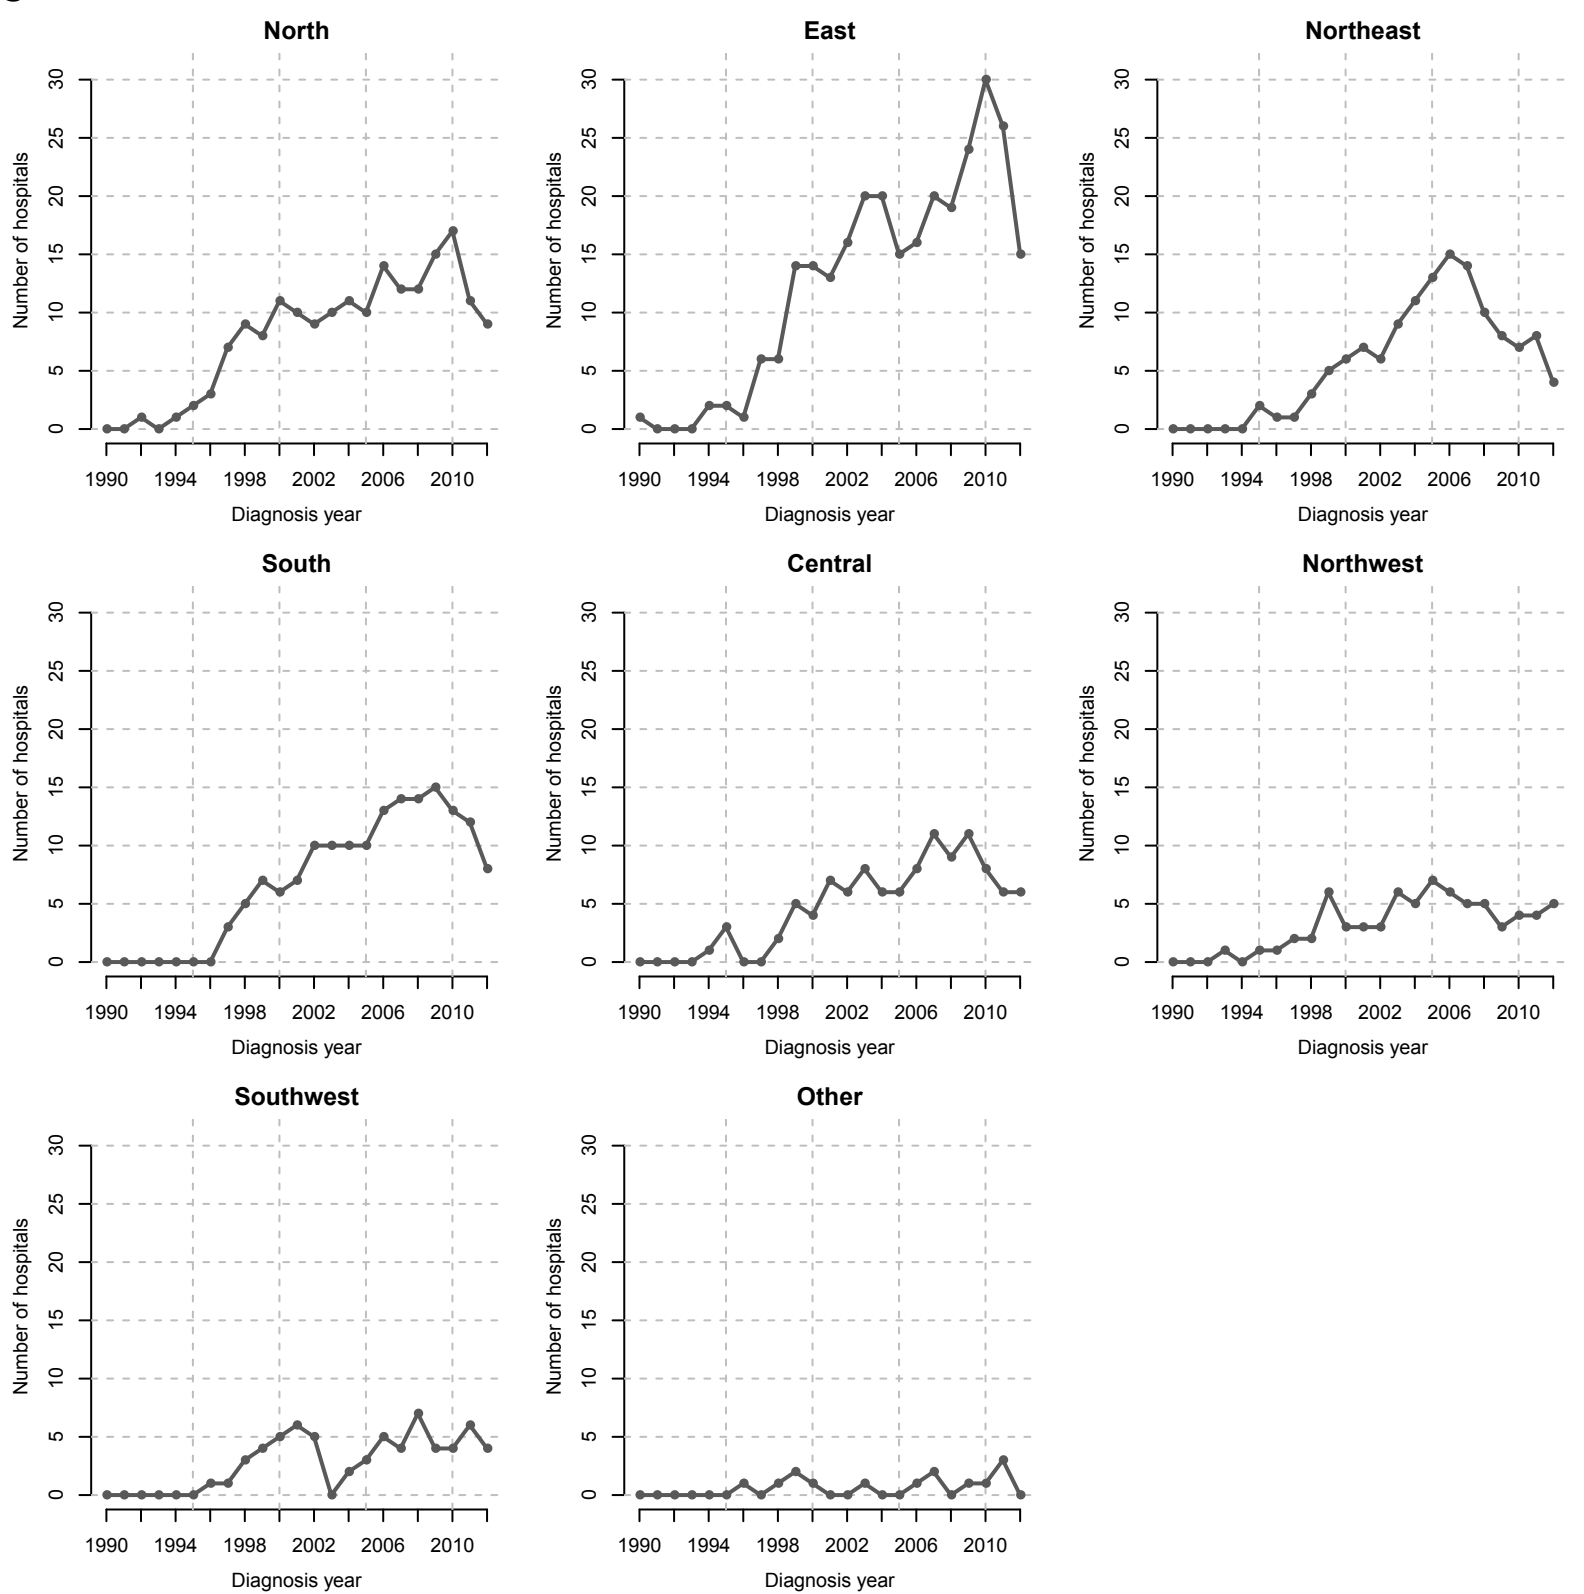

D

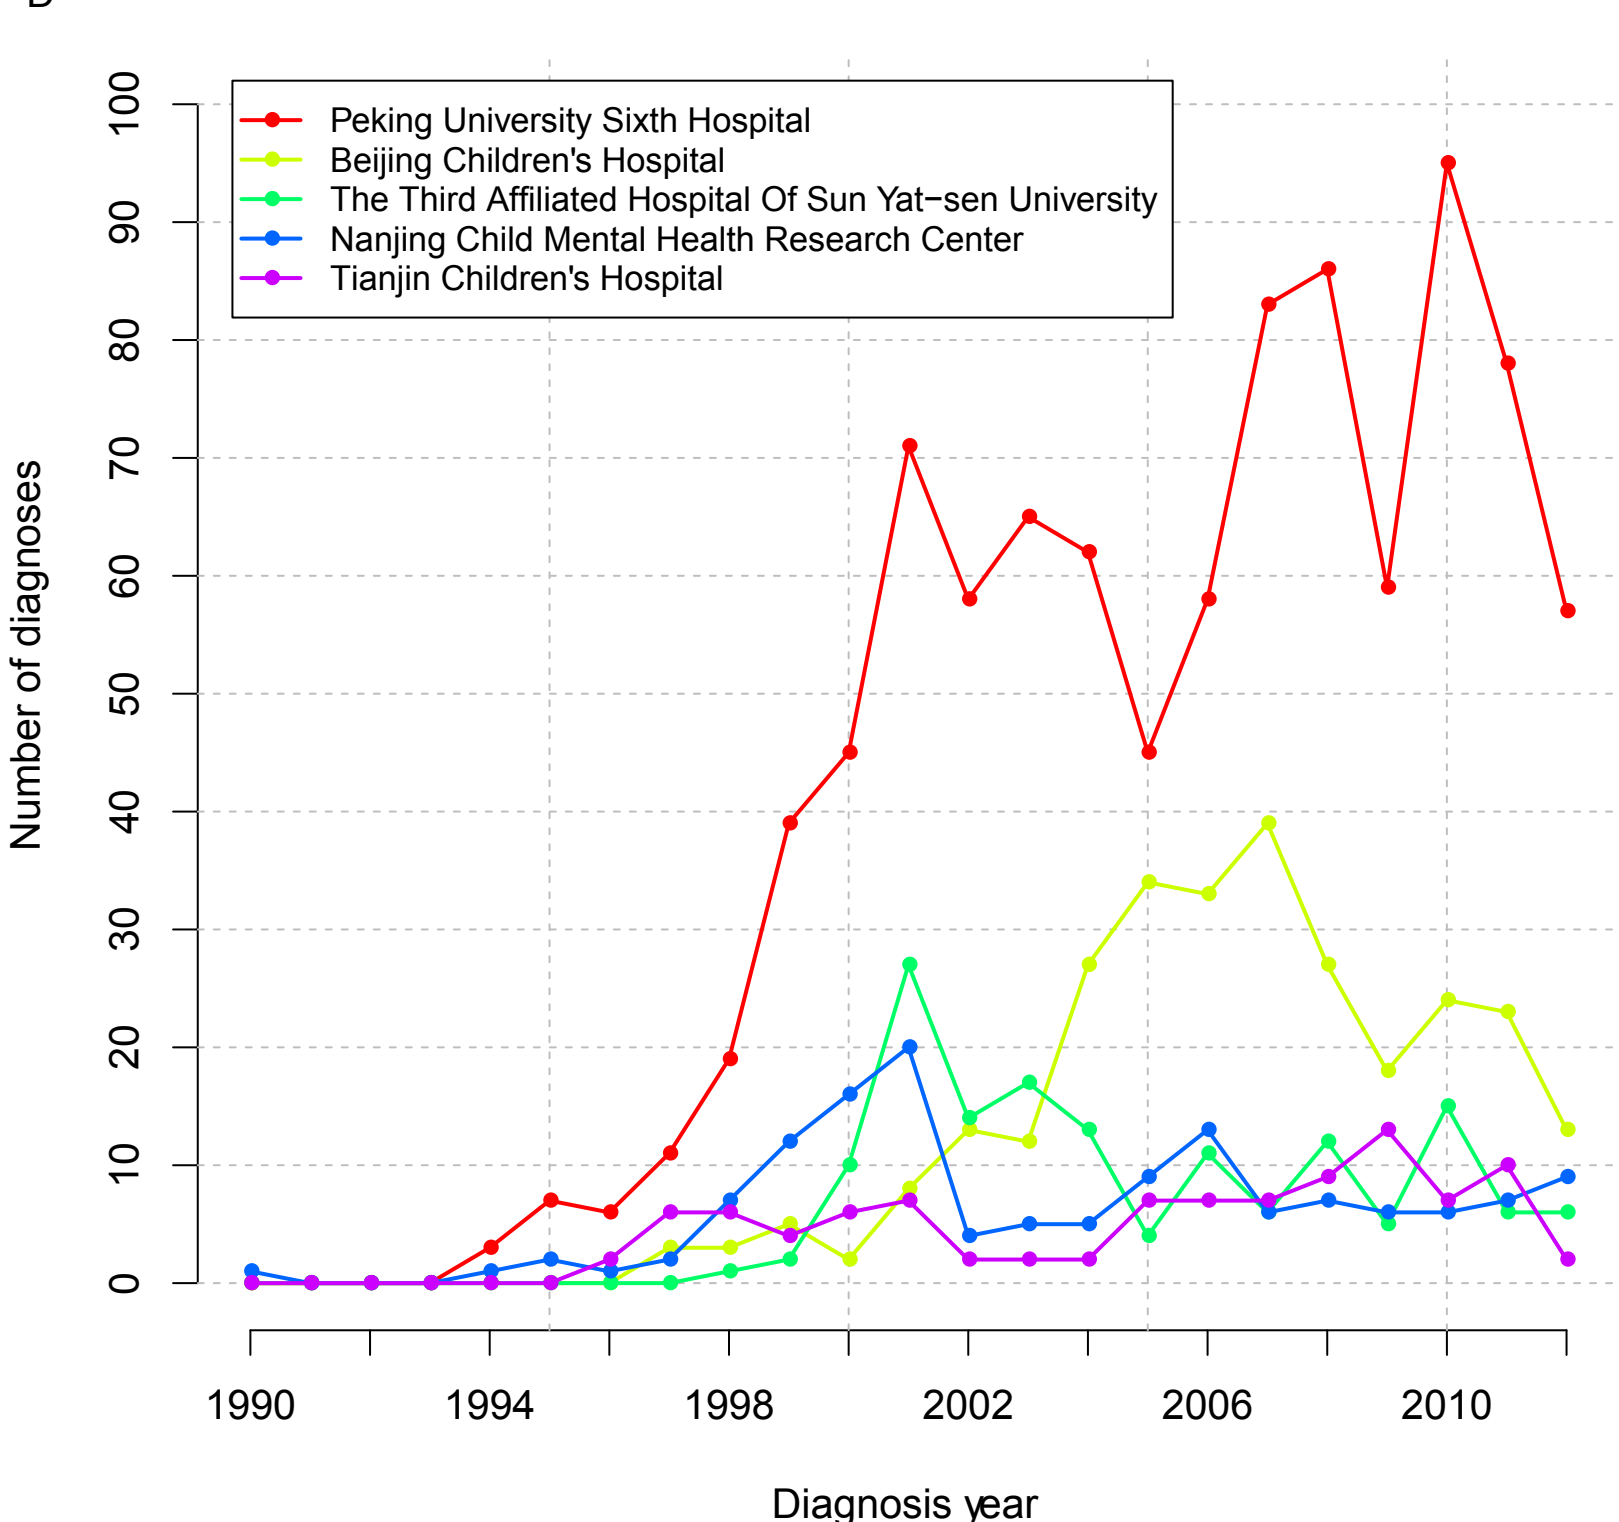

Supplement: 13229_2014_154_MOESM6_ESM.pdf [file 13229_2014_154_MOESM6_ESM.pdf]
