# Supplementary material for: Statistical analysis of twenty years (1993 to 2012) of data from mainland China’s first intervention center for children with autism spectrum disorder
Source: Mol Autism. 2014 Nov 12;5:52. doi: 10.1186/2040-2392-5-52 (PMC4332440; doi:10.1186/2040-2392-5-52)
Supplement: Supplementary file 3 — Additional file 3: Table S5-S8: The male and female count and ratio of children registered at the Beijing Stars and Rain Education Institute for Autism (SR). There were 5,143 children in total, among which 2,834 children had a parent-reported clinical diagnosis of autism spectrum disorder (ASD) or ‘autistic tendencies’. For analyses related to diagnosis, after applying the criteria on the age at registration, there remained 2,138 children. (XLS 37 KB) [file 13229_2014_154_MOESM3_ESM.xls]

## Sheet: Table S5
5A. Sex ratio of all 5134 children registered at S&R from different regions
region	male_count	female_count	total_count	male_female_ratio	fisher_test_p_value	fisher_test_FDR
Beijing	533	93	633	5.73118	0.0827857	0.5795
North	772	116	890	6.65517	0.69715	1
East	1083	166	1257	6.5241	0.461587	1
Northeast	697	100	799	6.97	0.953726	1
South	518	47	569	11.0213	0.000756017	0.00680415
Central	369	58	430	6.36207	0.543038	1
Northwest	235	30	266	7.83333	0.569065	1
Southwest	174	23	198	7.56522	0.74354	1
Other	5	3	8	1.66667	0.0694258	0.555406
5B. Sex ratio of 2834 children diagnosed as ASD or "autistic tendencies" from different regions
region	male_count	female_count	total_count	male_female_ratio	fisher_test_p_value	fisher_test_FDR
Beijing	281	45	326	6.24444	0.47893	1
North	443	62	505	7.14516	0.824681	1
East	608	85	694	7.15294	0.792033	1
Northeast	374	65	440	5.75385	0.137357	1
South	291	33	325	8.81818	0.18185	1
Central	202	32	234	6.3125	0.607427	1
Northwest	140	18	158	7.77778	0.712128	1
Southwest	100	12	112	8.33333	0.662779	1
Other	3	1	4	3	0.417467	1

## Sheet: Table S6
6A. Sex ratio of all 5134 children registered at S&R with different paternal education levels
paternal_education_level	male_count	female_count	total_count	male_female_ratio	fisher_test_p_value	fisher_test_FDR
M	299	37	336	8.08108	0.479395	0.95879
H	542	62	604	8.74194	0.0693502	0.346751
J	564	90	654	6.26667	0.247424	0.742273
R	796	126	922	6.31746	0.158373	0.633492
G	183	23	206	7.95652	0.660267	0.95879
6B. Sex ratio of all 5134 children registered at S&R with different maternal education levels
maternal_education_level	male_count	female_count	total_count	male_female_ratio	fisher_test_p_value	fisher_test_FDR
M	361	47	408	7.68085	0.570329	1
H	608	91	699	6.68132	0.643694	1
J	637	79	716	8.06329	0.167747	0.670988
R	662	112	774	5.91071	0.0627635	0.313818
G	117	13	130	9	0.417925	1
6C. Sex ratio of 2834 children diagnosed as ASD or "autistic tendencies" with different paternal education levels
paternal_education_level	male_count	female_count	total_count	male_female_ratio	fisher_test_p_value	fisher_test_FDR
M	223	25	248	8.92	0.259643	0.717296
H	405	51	456	7.94118	0.420557	0.717296
J	421	68	489	6.19118	0.239099	0.717296
R	605	97	702	6.23711	0.15847	0.690577
G	151	14	165	10.7857	0.138115	0.690577
6d. Sex ratio of 2834 children diagnosed as ASD or "autistic tendencies" with different maternal education levels
maternal_education_level	male_count	female_count	total_count	male_female_ratio	fisher_test_p_value	fisher_test_FDR
M	259	35	294	7.4	0.77601	1
H	454	71	525	6.39437	0.444839	1
J	480	60	540	8	0.28912	1
R	515	81	596	6.35802	0.340906	1
G	96	11	107	8.72727	0.55024	1

## Sheet: Table S7
7. Sex ratio of 2138 children diagnosed as ASD or "autistic tendencies, aged six and under with different first diagnosis year
first_diagnosis_year	male_count	female_count	total_count	male_female_ratio
1995	7	1	8	7
1996	3	0	3	Inf
1997	10	2	12	5
1998	25	4	29	6.25
1999	54	4	58	13.5
2000	67	10	77	6.7
2001	100	15	115	6.66667
2002	101	16	117	6.3125
2003	111	19	130	5.84211
2004	112	19	131	5.89474
2005	134	19	153	7.05263
2006	166	20	186	8.3
2007	194	23	217	8.43478
2008	169	21	190	8.04762
2009	171	17	188	10.0588
2010	185	39	224	4.74359
2011	163	27	190	6.03704
2012	95	12	107	7.91667
logistic model for sex (ratio), with first diagnosis year
Model:	sex (Male vs Female) ~ first_diagnosis_year
	family: binomial(link = "logit")
Sample size:	2083	(restricted first_diagnosis_year in [1999,2012] for robustness)
Coefficients:
	Estimate	Std. Error	t value	Pr(>|t|)
(Intercept)	16.4848	37.2545	0.442	0.658
first_diagnosis_year	-0.007247	0.018567	-0.39	0.696
(Dispersion parameter for binomial family taken to be 1)
Null deviance:	1572.1	(df=2082)
Residual deviance:	1571.9	(df=2081)
AIC:	1575.9

## Sheet: Table S8
8. Sex ratio of 2138 children diagnosed as ASD or "autistic tendencies, aged six and under with different age at first diagnosis
age_at_first_diagnosis	male_count	female_count	total_count	male_female_ratio
[1, 2)	179	33	212	5.42424
[2, 3)	818	112	930	7.30357
[3, 4)	598	78	676	7.66667
[4, 5)	211	34	245	6.20588
[5, 6)	52	10	62	5.2
logistic model for sex (ratio), with age at first diagnosis
Model:	sex (Male vs Female) ~ age_at_first_diagnosis
	family: binomial(link = "logit")
Sample size:	2072
	(restricted diagnosis year in [1999,2012] and the age at first diagnosis in [1,6) for robustness)
Coefficients:
	Estimate	Std. Error	t value	Pr(>|t|)	Signif.
(Intercept)	1.86767	0.22987	8.125	4.48e-16	***
age_at_first_diagnosis	0.0255	0.07621	0.335	0.738
				Signif. codes:	0 '***' 0.001 '**' 0.01 '*' 0.05 '.' 0.1 ' ' 1
(Dispersion parameter for binomial family taken to be 1)
Null deviance:	1565.2	(df=2071)
Residual deviance:	1565.1	(df=2070)
AIC:	1569.1
